# Supplementary material
Source: PubMed Central journal article supplement (PMC6624427)
Supplement: NIHMS1036990-supplement-Supplemental_figures_and_tables.pdf [file NIHMS1036990-supplement-Supplemental_figures_and_tables.pdf]

**Cell Metabolism, Volume 25**

**Supplemental Information**

**Farnesoid X Receptor Regulation  
of the NLRP3 Inflammasome Underlies  
Cholestasis-Associated Sepsis**

**Haiping Hao, Lijuan Cao, Changtao Jiang, Yuan Che, Songyang Zhang, Shogo Takahashi, Guangji Wang, and Frank J. Gonzalez**

## **Inventory of Supplementary Information:**

**Figure S1.** Time-course of the metabolomic alterations in LPS-induced septic mice (**Related to Figure 1**)

**Figure S2.** Bile acids activate signal 1 and 2 of the NLRP3 inflammasome (**Related to Figure 2**)

**Figure S3.** Bile acids activation of IL-1 $\beta$  is independent of ROS and potassium efflux in THP-1 cells (**Related to Figure 3**)

**Figure S4.** Cholestasis potentiates septic shock associated with Nlrp3 inflammasome activation (**Related to Figure 4**)

**Figure S5.** FXR/bile acid axis controls septic shock (**Related to Figure 5**)

**Figure S6.** FXR is positively expressed and functional in macrophages (**Related to Figure 6**).

**Table S1.** Murine primer sequences for qPCR.

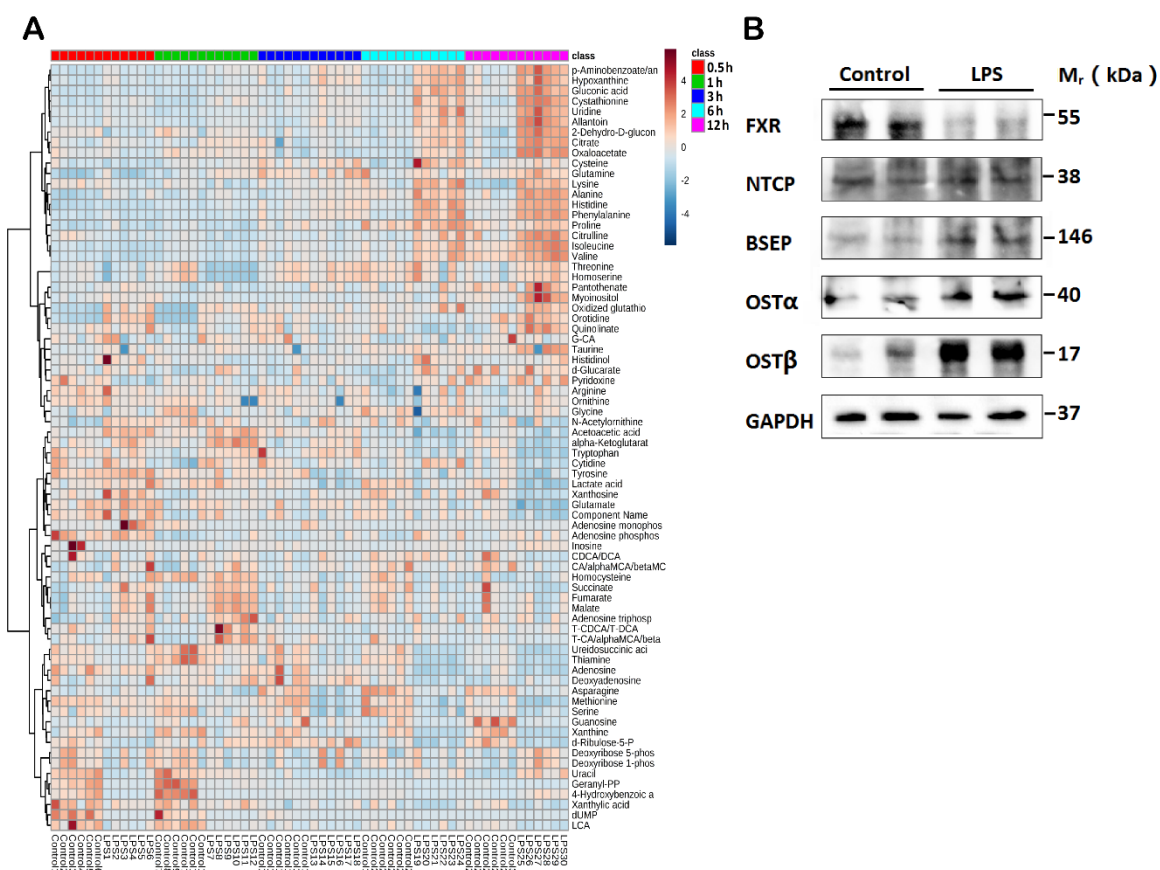

**Figure S1. Time-course of the metabolomic alterations in LPS-induced septic mice. (Related to Figure 1)**

**(A)** Heatmap illustrating a time-course of overall serum metabolic profiles of LPS-induced sepsis in mice. Distance was measured is by Pearson correlation and clustering was determined using the Ward algorithm. Mice were intraperitoneally injected with LPS at a dose of 30 mg/kg for the indicated times.

**(B)** Protein levels of FXR and BAs transporters in the liver of mice after 6 hours of LPS treatment; GAPDH was used as internal loading control in immunoblot analyses.

Data are representative of two independent experiments and shown as mean  $\pm$ SEM of six mice.

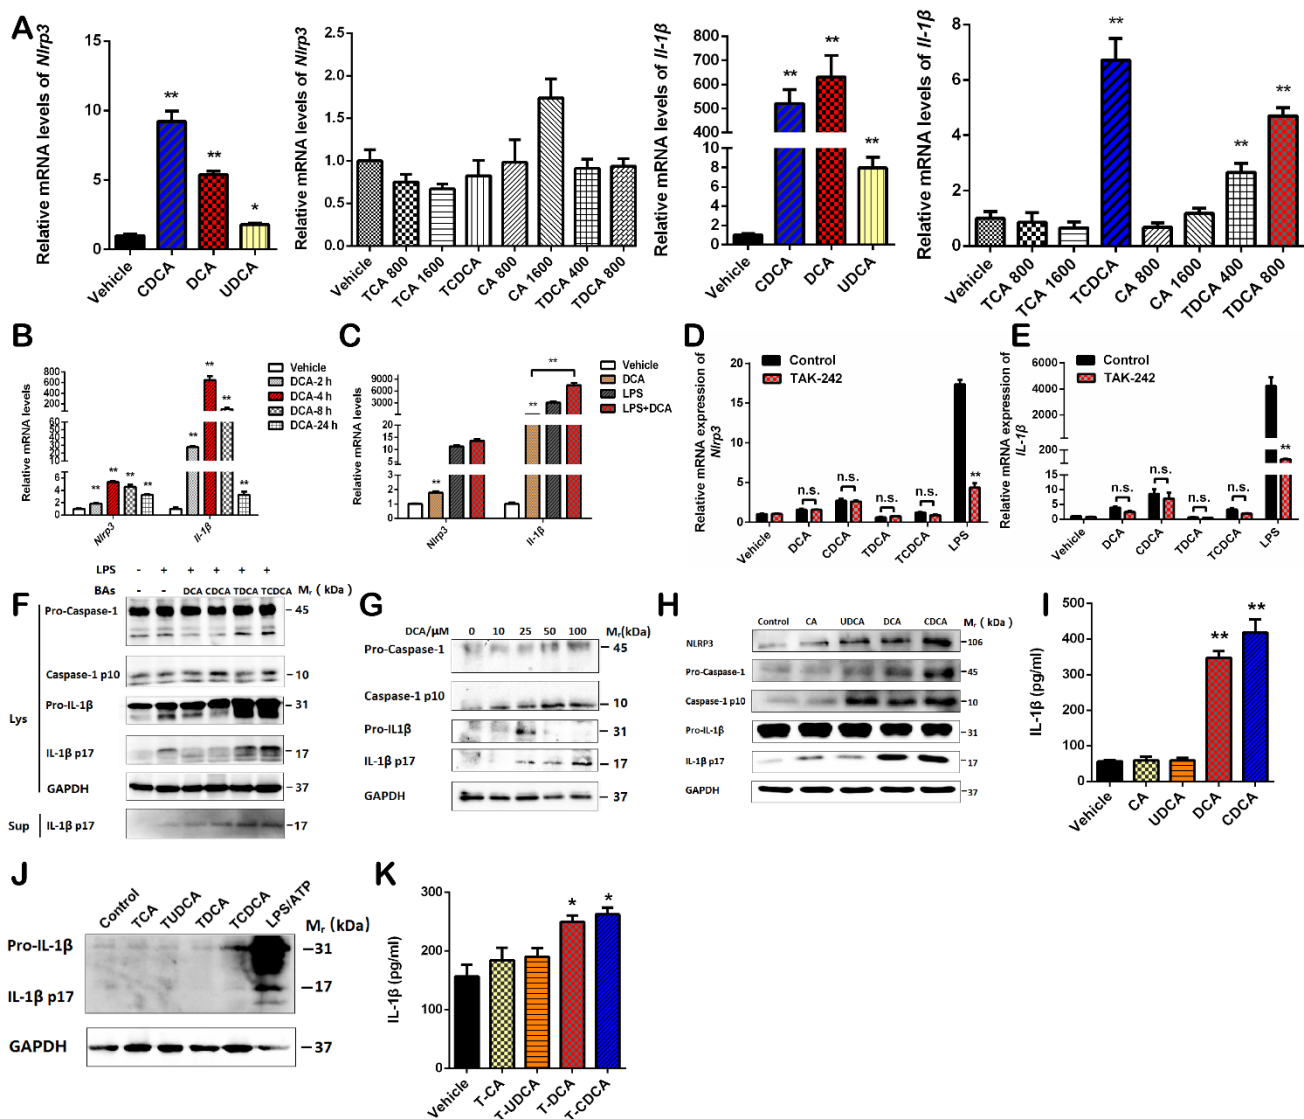

**Figure S2. Bile acids activate signal 1 and 2 of the NLRP3 inflammasome (Related to Figure 2)**

(A-C) Relative mRNA expression levels of *Nlrp3* and *Il-1β*. RAW264.7 cells were treated with bile acids for 4 hours at the indicated concentrations (A), or treated with 200 μM DCA for the indicated hours (B), or treated with 200 μM DCA for 4 hours with or without 50 ng/ml LPS priming for 2 hours. *Gapdh* mRNA was used as the internal standard in the qPCR analyses.

(D-E) Relative mRNA expression levels of *Nlrp3* and *Il-1β*. Mouse peritoneal macrophages were pretreated with 1 μM TAK-242 for 1 h prior to 50 μM bile acids or 100 ng/ml LPS for 4 hours. *Gapdh* mRNA was used as the internal standard in the qPCR analyses.

(F-H, J) Representative western blot analysis of Caspase-1 and IL-1β in THP-1 cells. Cells were primed with 50 ng/ml LPS for 2 hours before treating with 100 μM bile acids for 4 hours (F), or treated with DCA for 4 hours at the indicated concentrations (G), or treated with various unconjugated bile acids (H) or tauro-bile acids (J) at 200 μM for 4 hours. GAPDH was used as a loading control in the immunoblot analyses.

(I, K) ELISA analysis of IL-1β concentrations in the supernatants.

One representative experiment of three independent experiments is shown; for qPCR and ELISA assays, each was done in triplicate. Data are presented as mean ± SEM. \*\*P < 0.01, \*P < 0.05 versus vehicle unless indicated otherwise; by Student's *t*-test (two-tailed) (A, D, E, I, K) or two-way ANOVA (B-C).

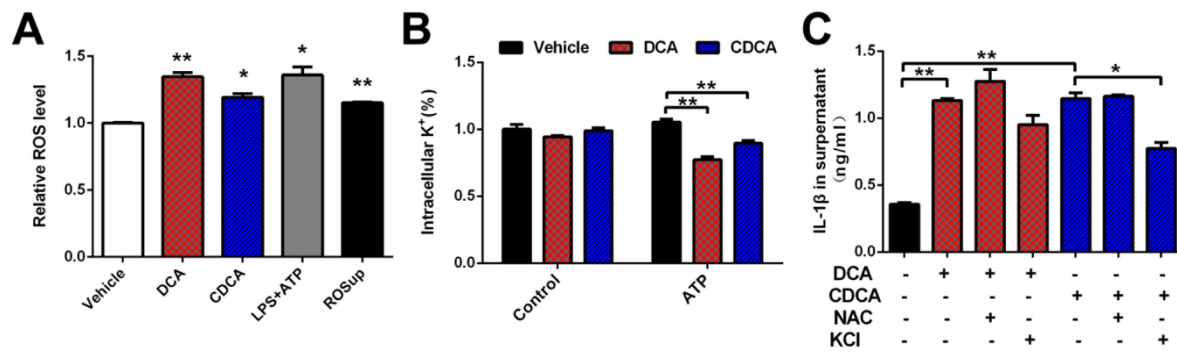

**Figure S3. Role of ROS and potassium efflux in bile acids activation of NLRP3 inflammasome in THP-1 cells (Related to Figure 3)**

**(A)** ROS levels in THP-1 cells. THP-1 cells were stimulated with 200  $\mu$ M bile acids for 4 hours or 50 ng/ml LPS for 2 hours followed by 2 mM ATP for 30 min; ROSup was used as a positive control.

**(B)** Intracellular potassium levels. Fluorescence detection was conducted at 4 hours after 200  $\mu$ M bile acid treatment with or without spiking of 2mM ATP at last 30 min.

**(C)** IL-1 $\beta$  levels in supernatant of THP-1 cells. THP-1 cells were stimulated with 200  $\mu$ M bile acids for 4 hours; ROS was scavenged by pretreatment with 3mM NAC for 30 min or K<sup>+</sup> efflux was blocked by high K<sup>+</sup> (136 mM KCl) in medium.

One representative experiment of three independent experiments is shown and each was done in triplicates; data are presented as mean  $\pm$  SEM (n=5, **A**, **B**; n=3, **C**). \*\*P < 0.01, \*P < 0.05 versus vehicle unless indicated otherwise; by Student's *t*-test, two-tailed.

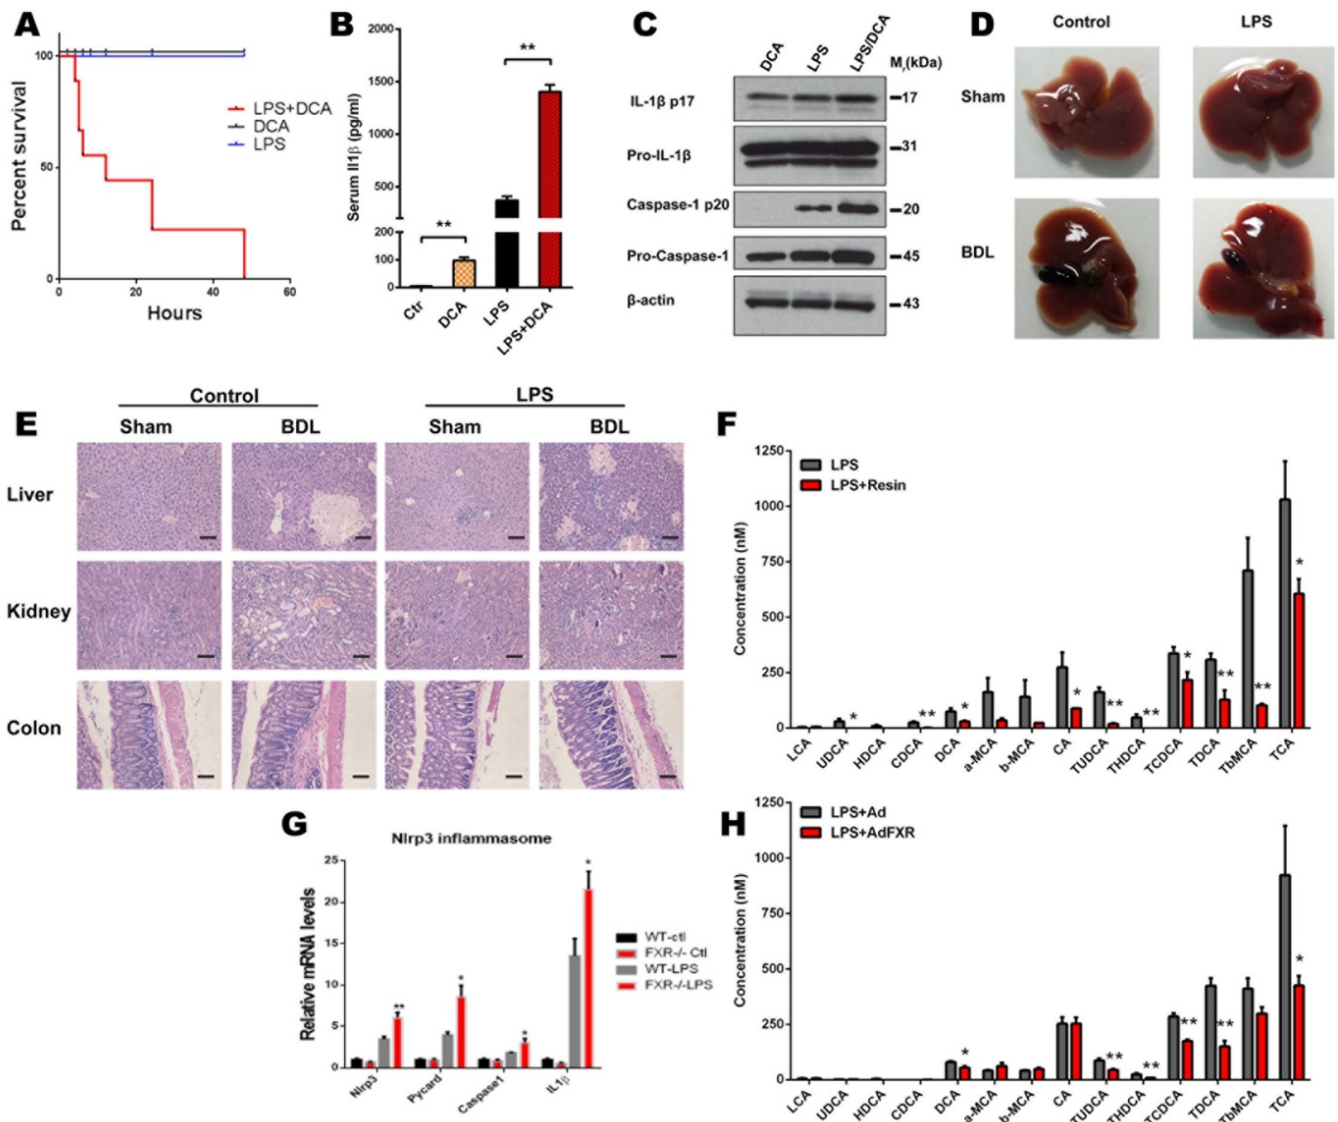

**Figure S4. Cholestasis aggravates septic shock associated with Nlrp3 inflammasome activation (Related to Figure 4)**

(A) Survival analysis (n=10).

(B) Serum levels of IL-1 $\beta$ .

(C) Western blot analysis of caspase 1 and IL-1 $\beta$  in PMs ex-vivo.  $\beta$ -actin was used as loading control.

Mice were intraperitoneally injected with 30 mg/kg LPS for 2 hours prior to 50 mg/kg DCA-Na, and were killed 4 hours after DCA-Na injection, unless for survival analysis.

(D) Photograph of gallbladder from mice that were challenged by LPS at a dose of 20 mg/kg for 6 hours three days after BDL operation.

(E) Histopathology of liver, kidney and colon analyzed by H&E staining; scale bars=50  $\mu$ m.

(F, H) Individual bile acids in serum.

(G) Relative mRNA levels of *Nlrp3*, *Pycard*, *Caspase-1* and *Il-1 $\beta$*  in PMs.

One representative experiment of two independent experiments is shown; for the qPCR and ELISA assays, each was done in triplicate. Data are shown as mean  $\pm$  SEM of six mice; \*\*P < 0.01, \*P < 0.05 compared to LPS group unless indicated otherwise, by two-way ANOVA (B) or Student's *t*-tests, two-tailed (F, G, H).

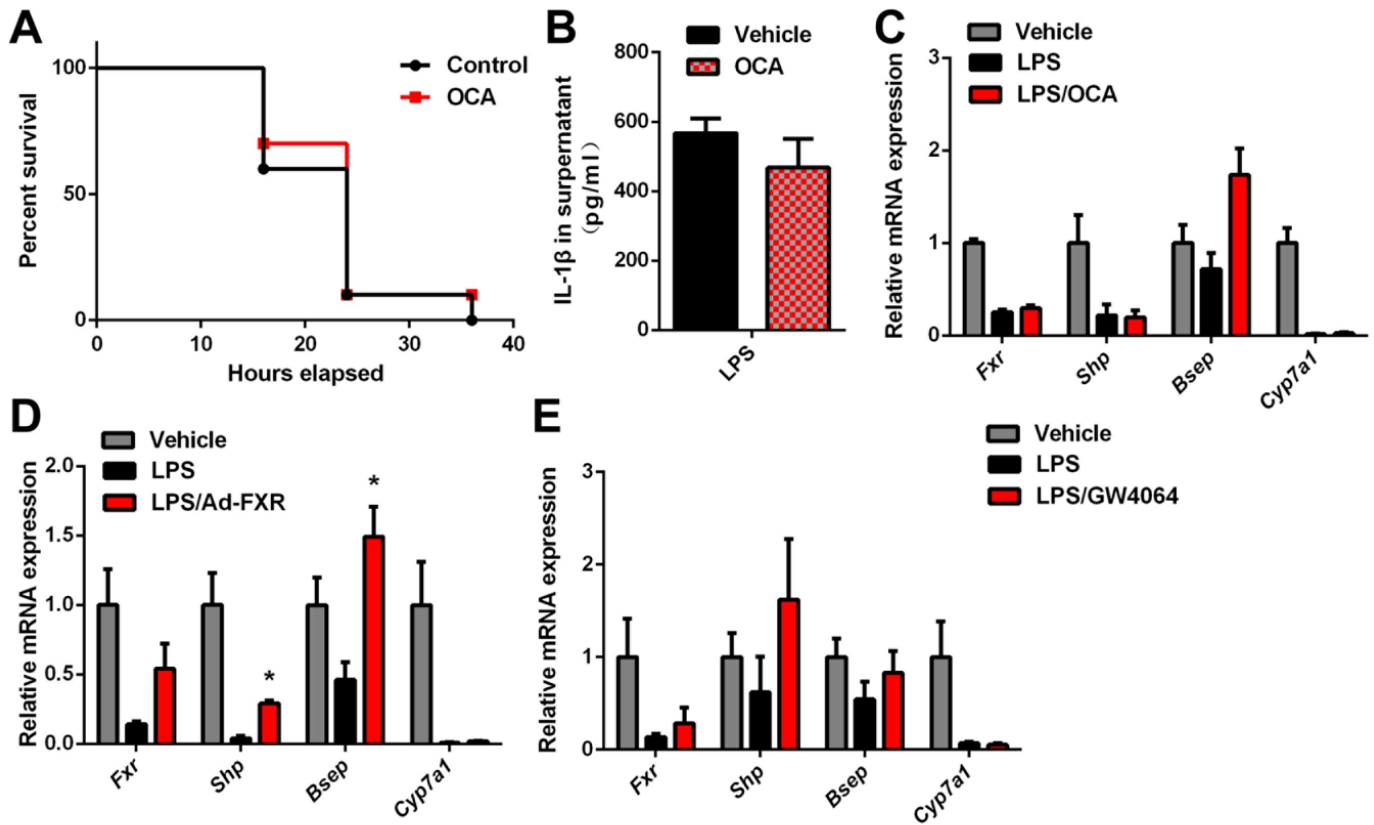

**Figure S5. FXR agonist do not inhibit septic shock in mice (Related to Figure 5)**

(A) Survival analysis (n=10).

(B) Serum levels of IL-1 $\beta$ .

(C-E) Relative mRNA levels of *Fxr*, *Shp*, *Bsep* and *Cyp7a1* mRNAs in liver of mice after 6 hours of LPS treatment. Mice were intragastrically administered 15 mg/kg OCA 1 hour prior to LPS challenge (30 mg/kg, i.p.), and killed 6 hours after LPS injection unless for survival analysis. One representative experiment of two independent experiments is shown; for the qPCR and ELISA assays, each was done in triplicate. Data are shown as mean  $\pm$  SEM of six mice; \*P < 0.05 compared to LPS group, by Student's *t*-tests, two-tailed.

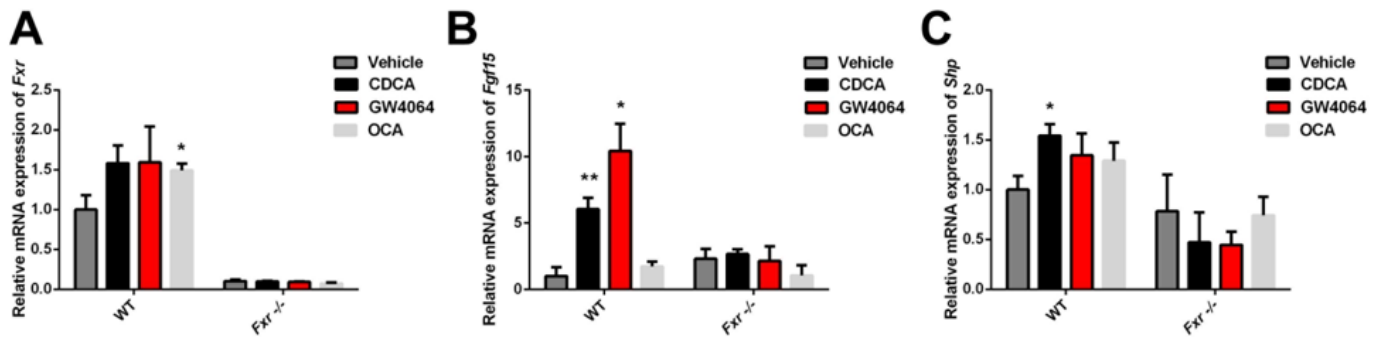

**Figure S6. FXR is positively expressed and functional in macrophages (Related to Figure 6)**

(A-C) Relative mRNA levels of *Fxr* mRNA (A), and its target gene *Fgf15* (B) and *Shp* (C) mRNAs in PMs from WT and *Fxr*<sup>-/-</sup> mice. Cells were treated with 50  $\mu$ M CDCA, 2  $\mu$ M GW4064 or 2  $\mu$ M OCA for 12 hours; *Gapdh* mRNA was used as the internal standard.

One representative experiment of three independent experiments is shown, and each was done in triplicate. Data are shown as mean  $\pm$ SEM (n=3); \*P < 0.05, \*\* P < 0.01 compared to vehicle control in each group, by Student's *t*-tests, two-tailed.



**Table S1. Murine primer sequences for qPCR.**

|                               | Forward (5'to 3')        | Reverse (5'to 3')       |
|-------------------------------|--------------------------|-------------------------|
| <i>Nlrp3</i>                  | ATTACCCGCCCGAGAAAGG      | TCGCAGCAAAGATCCACACAG   |
| <i>Il-1<math>\beta</math></i> | GCAACTGTTCTGAACTCAACT    | ATCTTTTGGGGTCCGTCAACT   |
| <i>Pycard</i>                 | CTTGTCAGGGGATGAACTCAAAA  | GCCATACGACTCCAGATAGTAGC |
| <i>Caspase-1</i>              | ACAAGGCACGGGACCTATG      | TCCCAGTCAGTCCTGGAAATG   |
| <i>Pannexin-1</i>             | CCACCGAGCCCAAGTTCAA      | GGAGAAGCAGCTTATCTGGGT   |
| <i>Gapdh</i>                  | TTGAGGTCAATGAAGGGGTC     | TCGTCCCCTAGACAAAATGG    |
| <i>Fxr</i>                    | TGGGCTCCGAATCCTCTTAGA    | TGGTCCTCAAATAAGATCCTTGG |
| <i>Shp</i>                    | CGATCCTCTTCAACCCAGATG    | AGGGCTCCAAGACTTCACACA   |
| <i>Fgf15</i>                  | ATGGCGAGAAAGTGGAACGG     | CTGACACAGACTGGGATTGCT   |
| <i>Osta</i>                   | AGGCAGGACTCATATCAAACCTTG | TGAGGGCTATGTCCACTGGG    |
| <i>Ost<math>\beta</math></i>  | AGATGCGGCTCCTTGGAATTA    | TGGCTGCTTCTTTCGATTTCTG  |
| <i>Bsep</i>                   | TCTGACTCAGTGATTCTTCGCA   | CCCATAAACATCAGCCAGTTGT  |
| <i>Ntcp</i>                   | CAAACCTCAGAAGGACCAACA    | GTAGGAGGATTATCCCGTTGTG  |
| <i>Cyp7a1</i>                 | GCTGTGGTAGTGAGCTGTTG     | GTTGTCCAAAGGAGGTTCCACC  |
